# Supplementary material for: Phytochemical Fingerprinting and In Vitro Bioassays of the Ethnomedicinal Fern Tectaria coadunata (J. Smith) C. Christensen from Central Nepal
Source: MDPI journal article supplement (doi:10.3390/molecules24244457), 2019-12-05
Supplement: s1 [file s1]

# Supplementary material

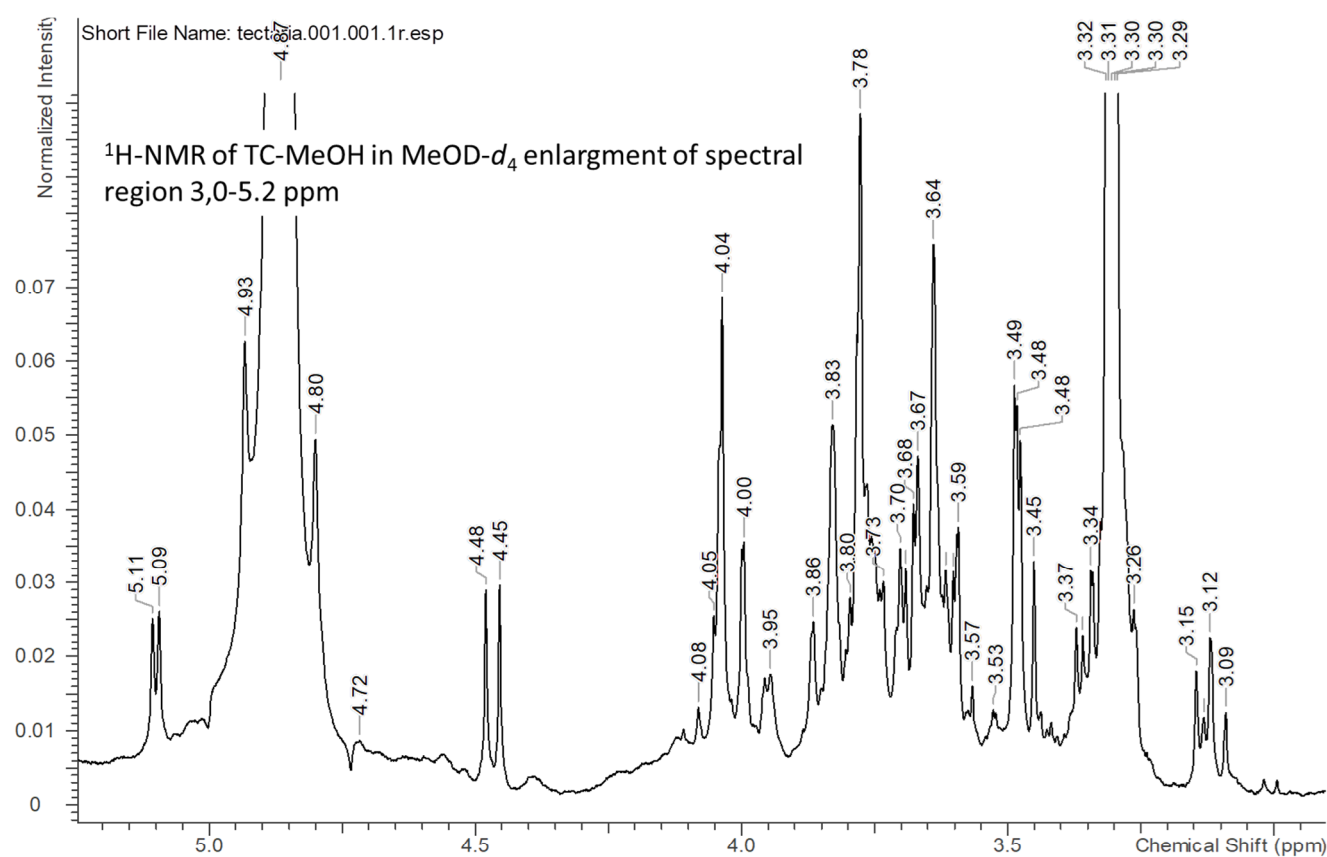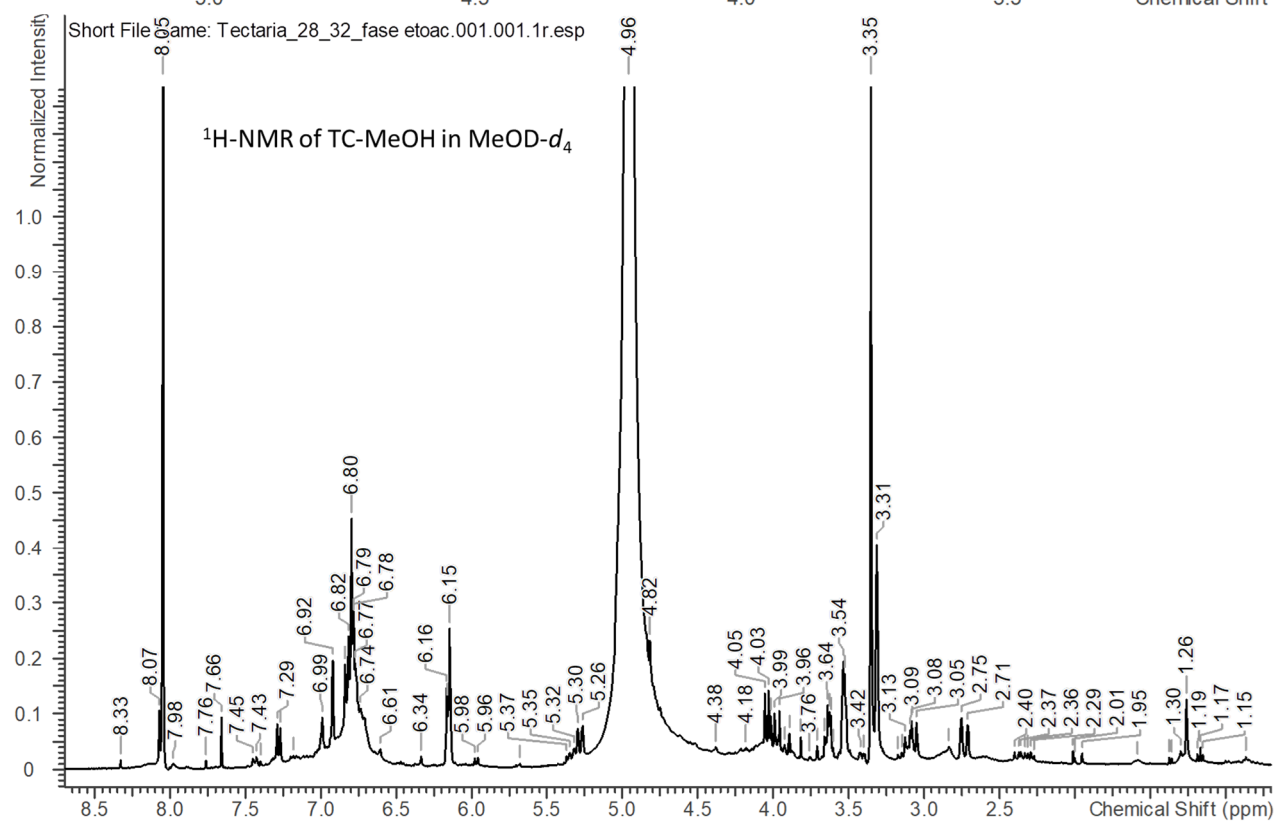

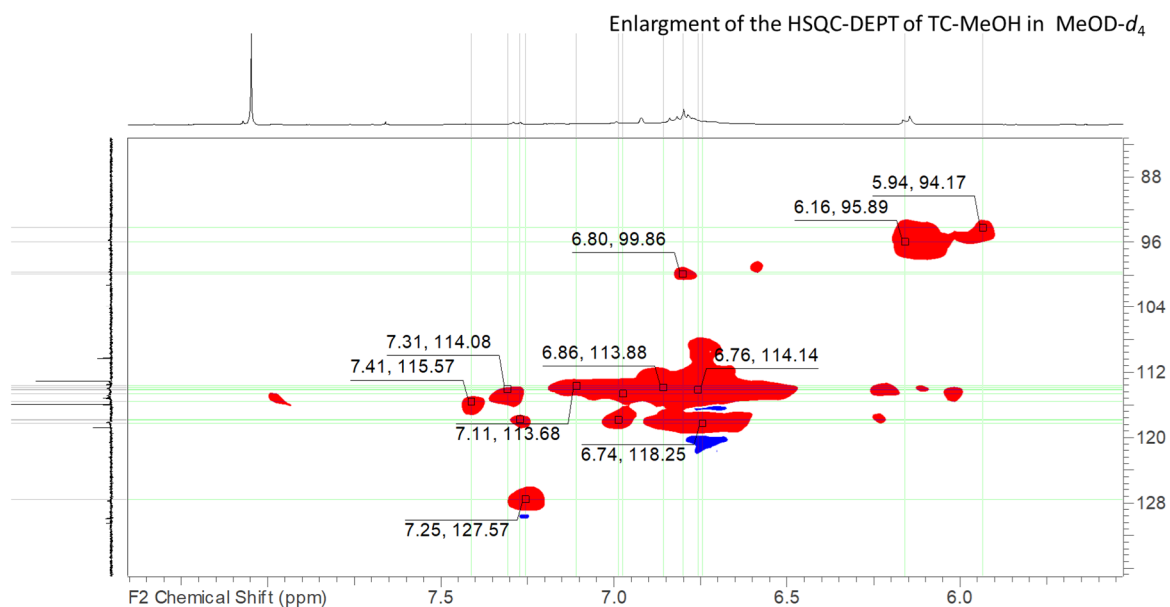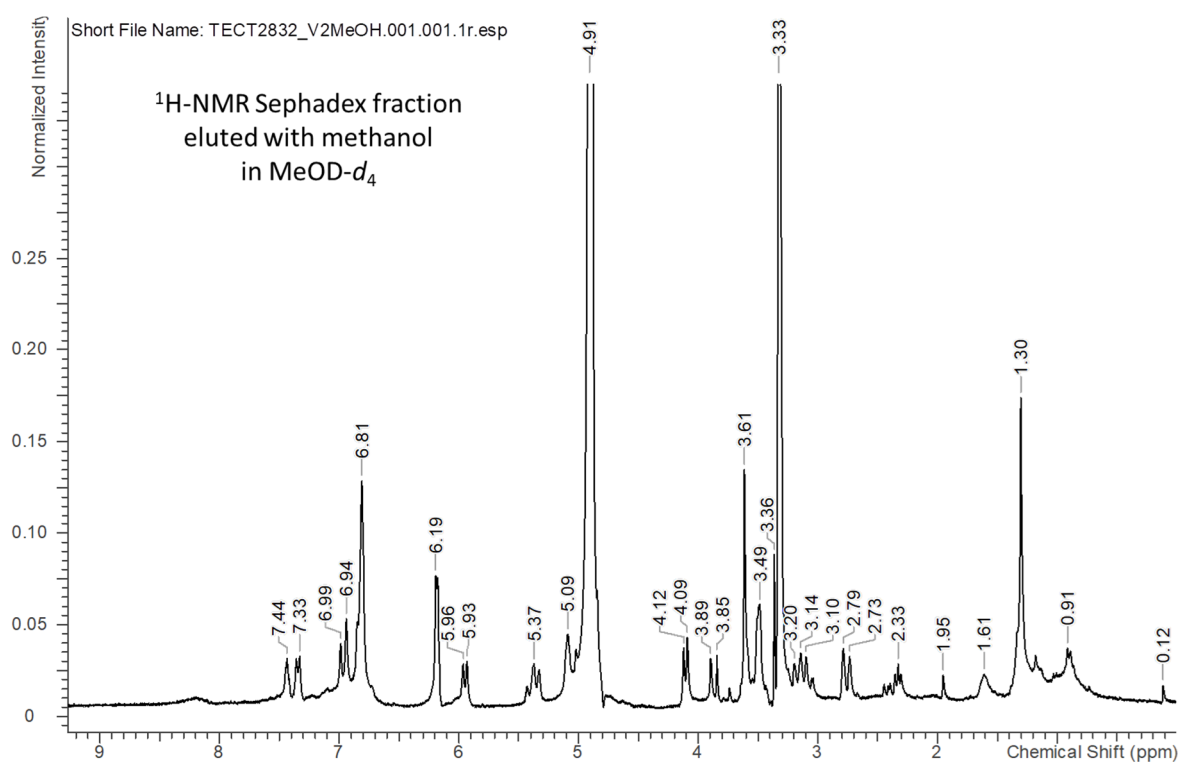

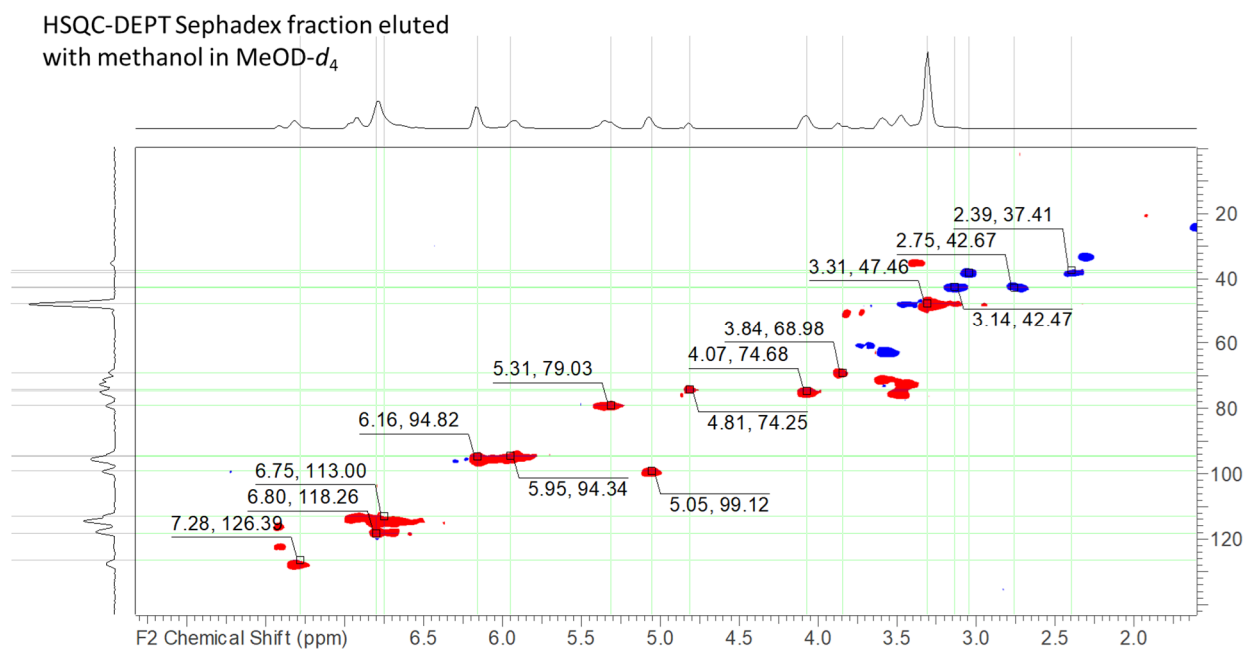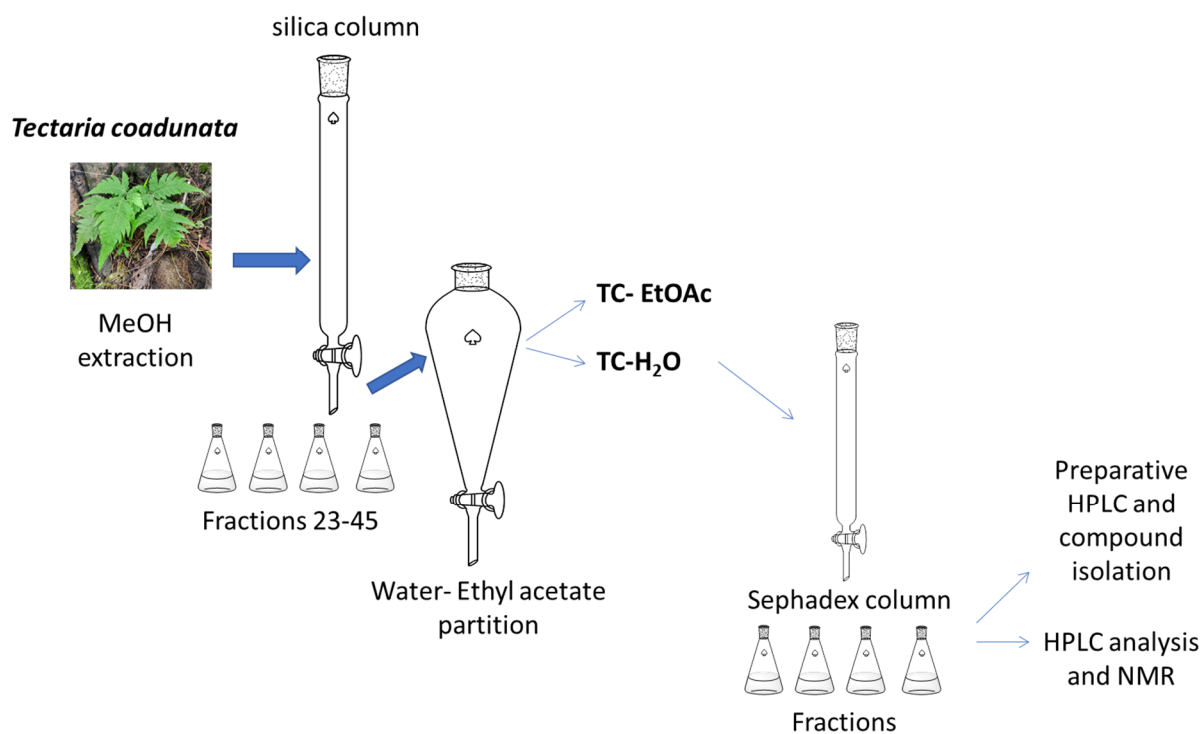

Schematic representation of extraction and fractionation procedures
